# Supplementary material
Source: ML conference proceedings conference paper supplement (https://openaccess.thecvf.com/content/CVPR2023/html/Jeon_Context-Based_Trit-Plane_Coding_CVPR_2023_paper.html)
Supplement: Supplementary file 2 [file Jeon_Context-Based_Trit-Plane_Coding_CVPR_2023_supplemental.zip]

Archive with 2 entries (2 files):
- context_based_trit_plane_coding_for_progressive_image_compression_appendix_embedded.pdf
- CTC_video_4k_comp.mp4
